# Supplementary material for: Electrophysiological Characteristics of Six Mutations in hClC-1 of Korean Patients with Myotonia Congenita
Source: PubMed Central journal article supplement — Mol Cells. 2014 Mar 13;37(3):202–12. doi: 10.14348/molcells.2014.2267 (PMC3969040; doi:10.14348/molcells.2014.2267), 2014-03-13
Supplement: molcell-37-3-202-3-supplementary.pdf [file molcell-37-3-202-3-supplementary.pdf]

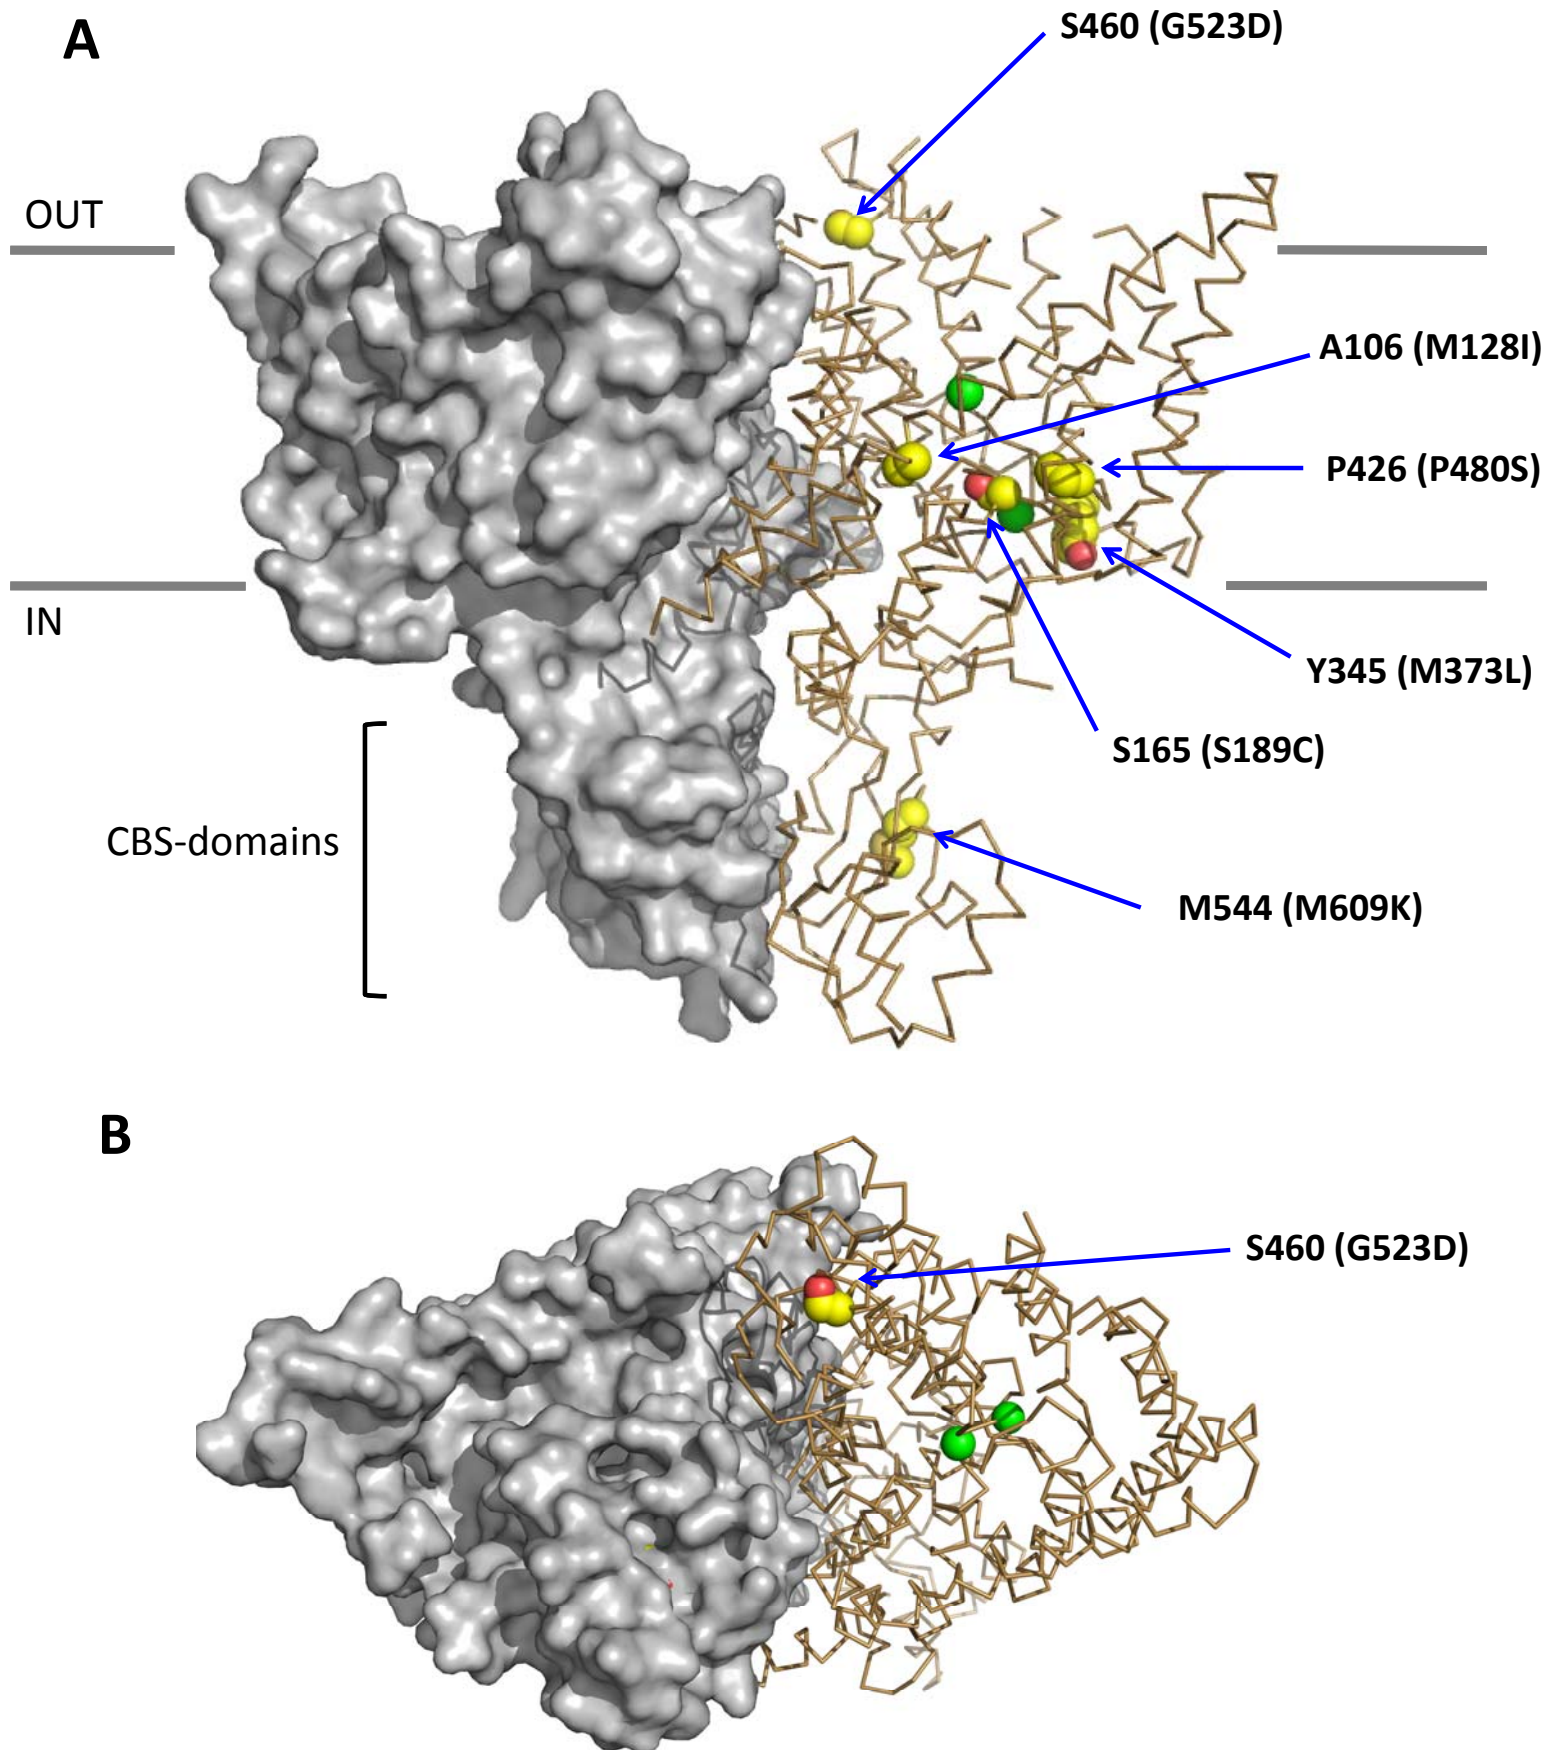

**Figure 1. Relative positions of CLC-1 mutations on the known structure of eukaryotic CLC, cmCLC (pdb #3ORG). A.** Side-view of cmCLC. Each subunit is drawn as surface or ribbon. Arrows indicate relative positions of CLC-1 mutations based on amino acids sequence alignment. Residue name and number in the parenthesis indicate CLC-1 mutations tested in this study. **B.** Top view shows the mutation, G523D in CLC-1 is closely located near dimer interface.
